# Supplementary material for: Theoretical exploration of the nanoscale host–guest interactions between [n]cycloparaphenylenes (n = 10, 8 and 9) and fullerene C60: from single- to three-potential well
Source: Royal Society of Chemistry journal article supplement (doi:10.1039/c5cp02882e), 2015-01-01
Supplement: c5cp02882e1.pdf [file c5cp02882e1.pdf]

## *Electronic supplementary information*

# **Theoretical Exploration of the Nanoscale Host-Guest Interactions between [n]Cycloparaphenylenes (n=10, 8 and 9) and Fullerene C<sub>60</sub>: From Single- to Three-Potential Well**

Kun Yuan<sup>a,b</sup>, Cai-Hua Zhou<sup>a</sup>, Yuan-Cheng Zhu<sup>b</sup>, Xiang Zhao<sup>a,\*</sup>

<sup>a</sup> *Institute for Chemical Physics & Department of Chemistry, State Key Laboratory of Electrical Insulation and Power Equipment, Xi'an Jiaotong University, Xi'an 710049, China*

<sup>b</sup> *College of Chemical Engineering and Technology, Tianshui Normal University, Tianshui, 741001, China*

### **Corresponding Author**

\* Fax: +86 29 8266 8559. Tel: +86 29 8266 5671. E-mail: [xzhao@mail.xjtu.edu.cn](mailto:xzhao@mail.xjtu.edu.cn)

### **Contents:**

**Fig. S1** The configurations (Side view and Top view) of the [8]CPP $\supset$ C<sub>60</sub> host-guest complexes at B3LYP/DFT-D3/6-31G(D) level of theory

**Table S1** The Cartesian coordinates of [8]CPP $\supset$ C<sub>60</sub> optimized at B3LYP/DFT-D3/6-31G(D) level of theory

**Fig. S2** The configurations (Side view and Top view) of the F-[9]CPP $\supset$ C<sub>60</sub> host-guest complexes at B3LYP/DFT-D3/6-31G(D) level of theory

**Table S2** The Cartesian coordinates of F-[9]CPP $\supset$ C<sub>60</sub> optimized at B3LYP/DFT-D3/6-31G(D) level of theory

**Fig. S3** The configurations (Side view and Top view) of the I-[9]CPP $\supset$ C<sub>60</sub> host-guest complexes at B3LYP/DFT-D3/6-31G(D) level of theory

**Table S3** The Cartesian coordinates of I-[9]CPP $\supset$ C<sub>60</sub> optimized at B3LYP/DFT-

---

\* *corresponding author, e-mail: [xzhao@mail.xjtu.edu.cn](mailto:xzhao@mail.xjtu.edu.cn)*

D3/6-31G(D) level of theory

**Fig. S4** The configurations (Side view and Top view) of the [10]CPP $\supset$ C<sub>60</sub> host-guest complexes at B3LYP/DFT-D3/6-31G(D) level of theory

**Table S4** The Cartesian coordinates of [10]CPP $\supset$ C<sub>60</sub> optimized at B3LYP/DFT-D3/6-31G(D) level of theory

**Fig. S5** Energy profiles of the approach of C<sub>60</sub> through the cavities of [9]CPPs rings at B3LYP/DFT-D3/6-31G(D) level of theory

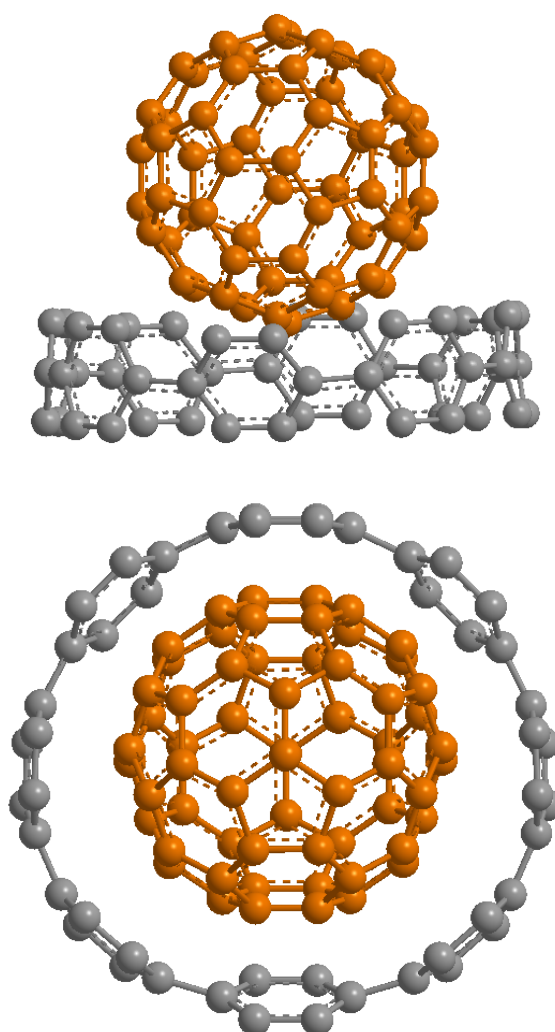

**Fig. S1** The configurations (Side view and Top view) of the [8]CPP $\supset$ C<sub>60</sub> host-guest complexes at B3LYP/DFT-D3/6-31G(D) level of theory.

**Table S1** The Cartesian coordinates of [8]CPP $\supset$ C<sub>60</sub> optimized at B3LYP/DFT-D3/6-31G(D) level of theory

| Atom | x           | y           | z           |
|------|-------------|-------------|-------------|
| C    | 5.02496600  | -2.55461900 | -2.66909400 |
| C    | 4.64209600  | -3.04314600 | -3.93492500 |
| C    | 3.60301300  | -3.95124400 | -4.07432300 |
| C    | 2.87990600  | -4.41131500 | -2.95655200 |
| C    | 3.45486600  | -4.15480900 | -1.70069300 |
| C    | 4.50855000  | -3.25558900 | -1.56238400 |
| C    | -2.82437200 | -4.44478400 | -2.95251400 |
| C    | -3.55446600 | -3.99351400 | -4.06941500 |
| C    | -4.60514600 | -3.09912900 | -3.92869000 |
| C    | -4.99404000 | -2.61704600 | -2.66223000 |
| C    | -4.46725600 | -3.31171000 | -1.55648800 |
| C    | -3.40110800 | -4.19599900 | -1.69597300 |
| C    | -5.59182500 | -1.26265900 | -2.51802700 |
| C    | 5.60405500  | -1.19207000 | -2.52621900 |
| C    | 5.62527800  | -0.53370500 | -1.28251800 |
| C    | 5.55249100  | 0.85268700  | -1.19491600 |
| C    | 5.45861700  | 1.65426700  | -2.34547400 |
| C    | 5.75086000  | 1.01173300  | -3.56483900 |
| C    | 5.81842900  | -0.37142100 | -3.65284600 |
| C    | -2.79428300 | 4.92981000  | -2.14530400 |
| C    | -3.60676000 | 4.61741300  | -1.03845500 |
| C    | -4.59271600 | 3.63546000  | -1.11301800 |
| C    | -4.82281200 | 2.91136000  | -2.29930300 |
| C    | -4.12853300 | 3.35130400  | -3.44110000 |
| C    | -3.14756000 | 4.32707500  | -3.36647400 |
| C    | -5.82126800 | -0.44521700 | -3.64409700 |
| C    | -5.77308000 | 0.93879100  | -3.55639100 |
| C    | -5.48672700 | 1.58548300  | -2.33780600 |
| C    | -5.56591000 | 0.78276200  | -1.18703300 |
| C    | -5.61851100 | -0.60456000 | -1.27434600 |
| H    | 5.07871800  | -2.62948800 | -4.83713800 |
| H    | 3.28475200  | -4.22877100 | -5.07447300 |
| H    | 2.98626500  | -4.54180900 | -0.80256600 |
| H    | 4.82604300  | -3.00129500 | -0.55835800 |
| H    | 5.55704200  | -1.10102700 | -0.36193800 |
| H    | 5.42034300  | 1.29624600  | -0.21525300 |
| H    | 5.83220900  | 1.59178900  | -4.47853000 |
| H    | 5.93198500  | -0.81153000 | -4.63743400 |
| H    | -5.93174400 | -0.88706100 | -4.62827500 |
| H    | -5.86505700 | 1.51762000  | -4.46987200 |
| H    | -5.43649200 | 1.22820500  | -0.20788300 |

|   |             |             |             |
|---|-------------|-------------|-------------|
| H | -5.53812100 | -1.17050000 | -0.35388800 |
| H | -2.92597600 | -4.57620500 | -0.79821400 |
| H | -4.78761200 | -3.06260100 | -0.55210800 |
| H | -3.23349600 | -4.26626900 | -5.06999800 |
| H | -5.04746100 | -2.69025600 | -4.83031500 |
| H | -5.14323100 | 3.38653300  | -0.21109900 |
| H | -3.42481800 | 5.09741800  | -0.08163100 |
| H | -4.25752200 | 2.83241600  | -4.38395200 |
| H | -2.55648600 | 4.52230700  | -4.25390000 |
| C | -1.46117700 | 5.57170500  | -2.03485600 |
| C | -0.73382600 | 5.52214300  | -0.83365400 |
| C | 0.65864300  | 5.53196000  | -0.83478400 |
| C | 1.38352800  | 5.59054800  | -2.03704500 |
| C | 0.65128400  | 5.96426700  | -3.18268800 |
| C | -0.73561600 | 5.95530500  | -3.18153000 |
| H | -1.24272200 | 5.31363300  | 0.09970100  |
| H | 1.17188600  | 5.33121400  | 0.09775300  |
| H | 1.17015200  | 6.17668800  | -4.11220600 |
| H | -1.25868800 | 6.16134800  | -4.11011700 |
| C | 3.08324900  | 4.36633600  | -3.37066800 |
| C | 4.07592400  | 3.40259600  | -3.44653100 |
| C | 4.77707800  | 2.97112700  | -2.30569500 |
| C | 4.53920400  | 3.69194400  | -1.11898200 |
| C | 3.54158700  | 4.66192600  | -1.04316500 |
| C | 2.72420500  | 4.96480200  | -2.14908000 |
| H | 2.48876100  | 4.55438400  | -4.25736400 |
| H | 4.21016600  | 2.88557600  | -4.38966100 |
| H | 5.09360800  | 3.44957900  | -0.21768500 |
| H | 3.35494400  | 5.13939100  | -0.08598600 |
| C | -0.66595800 | -4.28869200 | -4.14776600 |
| C | -1.40168400 | -4.84190800 | -3.08386700 |
| C | -0.66313700 | -5.50924000 | -2.08874700 |
| C | 0.73251300  | -5.50114500 | -2.08971300 |
| C | 1.46185200  | -4.82533700 | -3.08589800 |
| C | 0.71824400  | -4.28065600 | -4.14874000 |
| H | -1.18171700 | -3.74046600 | -4.92766000 |
| H | -1.18243000 | -5.99572900 | -1.26808700 |
| H | 1.25859800  | -5.98154300 | -1.26975300 |
| H | 1.22654400  | -3.72641200 | -4.92927700 |
| C | 1.19767200  | -1.53765000 | 5.30732300  |
| C | 0.76321100  | -2.74284000 | 4.61724600  |
| C | 1.46632400  | -3.20104700 | 3.50260700  |
| C | 2.63408700  | -2.47214500 | 3.03033400  |
| C | 3.05050600  | -1.31706300 | 3.69282600  |

|   |             |             |             |
|---|-------------|-------------|-------------|
| C | 2.31740300  | -0.83979100 | 4.85541200  |
| C | 0.01135700  | -0.81111900 | 5.73370900  |
| C | -1.15611700 | -1.56762400 | 5.30763000  |
| C | -0.69109000 | -2.76138600 | 4.61747700  |
| C | -1.38246900 | -3.23754200 | 3.50305600  |
| C | 0.74527800  | -3.69745900 | 2.34042500  |
| C | 2.63350200  | -2.51765300 | 1.57609800  |
| C | 3.04393300  | -1.40454300 | 0.84329000  |
| C | 3.47866400  | -0.20145700 | 1.53452000  |
| C | 3.48388100  | -0.15767800 | 2.92877500  |
| C | 3.02171300  | 1.03643800  | 3.61959700  |
| C | 2.29898900  | 0.61472600  | 4.80970800  |
| C | 1.16129100  | 1.31124200  | 5.21741600  |
| C | -0.00646500 | 0.58305200  | 5.68929200  |
| C | -2.29347300 | -0.89869400 | 4.85598400  |
| C | -2.31215000 | 0.55581000  | 4.81017700  |
| C | -1.19257100 | 1.28123500  | 5.21773100  |
| C | -0.75816300 | 2.44048800  | 4.45292800  |
| C | 0.69722000  | 2.45908700  | 4.45280000  |
| C | 1.38970700  | 2.86309000  | 3.31147600  |
| C | 2.57559100  | 2.13562900  | 2.88535300  |
| C | 2.57446000  | 2.08930200  | 1.43084700  |
| C | 3.01379900  | 0.94486400  | 0.76985400  |
| C | 1.46600000  | -3.27426200 | 1.14885700  |
| C | -0.00443600 | 0.36324100  | -1.28293600 |
| C | 0.01332200  | -1.03149800 | -1.23769700 |
| C | -1.15437700 | -1.75821200 | -0.76108600 |
| C | -2.28838100 | -1.06067800 | -0.34997900 |
| C | -2.30831200 | 0.39206100  | -0.39670600 |
| C | -0.75533100 | 2.29048200  | -0.15662500 |
| C | 0.69721200  | 2.30867600  | -0.15673200 |
| C | 1.16413000  | 1.11997800  | -0.85348700 |
| C | 2.29851400  | 0.45093400  | -0.39739300 |
| C | 2.31540300  | -1.00188900 | -0.35059900 |
| C | 1.19932500  | -1.72814300 | -0.76127600 |
| C | -0.68930000 | -2.90208400 | 0.00896700  |
| C | -1.38109200 | -3.31085800 | 1.14905600  |
| C | -2.56706200 | -2.58395600 | 1.57684500  |
| C | -3.00609800 | -1.48172800 | 0.84425900  |
| C | -3.47116100 | -0.29015500 | 1.53548000  |
| C | -3.03561000 | 0.86752000  | 0.77073200  |
| C | -2.62631600 | 2.02314800  | 1.43136600  |
| C | -1.45801100 | 2.74761600  | 0.95799000  |
| C | 1.38806400  | 2.78348900  | 0.95779900  |

|   |             |             |             |
|---|-------------|-------------|-------------|
| C | 0.65673400  | 3.26454700  | 2.11907700  |
| C | -0.73886800 | 3.24688400  | 2.11918600  |
| C | -1.46105600 | 2.82675100  | 3.31173800  |
| C | -2.62824600 | 2.06935500  | 2.88597200  |
| C | -3.04568100 | 0.95899300  | 3.62042000  |
| C | -3.47750600 | -0.24655700 | 2.92972700  |
| C | -3.01443200 | -1.39461900 | 3.69355900  |
| C | -2.56841000 | -2.53858900 | 3.03098100  |
| C | 0.76361500  | -2.88330000 | 0.00898700  |
| C | -0.64938000 | -3.71535100 | 2.34054900  |
| C | -1.19174700 | 1.09008100  | -0.85320700 |

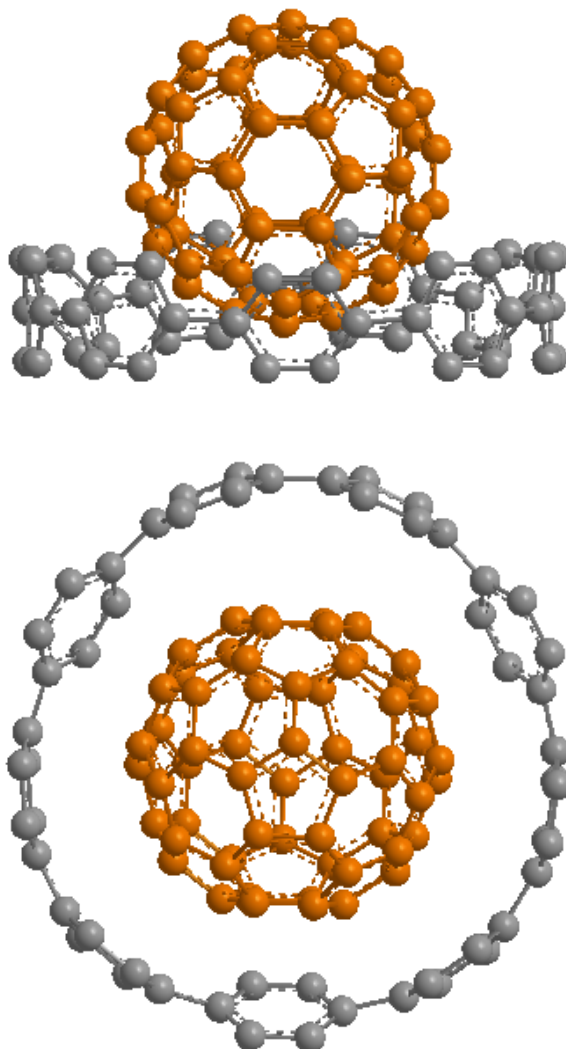

**Fig. S2** The configurations (Side view and Top view) of the F-[9]CPP $\supset$ C<sub>60</sub> host-guest complexes at B3LYP/DFT-D3/6-31G(D) level of theory.

**Table S2** The Cartesian coordinates of F-[9]CPP $\supset$ C<sub>60</sub> optimized at B3LYP/DFT-D3/6-31G(D) level of theory

| Atom | x           | y           | z           |
|------|-------------|-------------|-------------|
| C    | -3.27255200 | 5.48850100  | -1.50942200 |
| C    | -2.63496500 | 5.73093400  | -2.74283100 |
| C    | -1.28941800 | 6.05644800  | -2.81258600 |
| C    | -0.49561300 | 6.13998800  | -1.65323700 |
| C    | -1.18340600 | 6.14982400  | -0.42916600 |
| C    | -2.54041400 | 5.84059300  | -0.36024800 |
| C    | 6.45893800  | 0.03968000  | -1.44173000 |
| C    | 6.47420900  | -0.68819700 | -2.65027200 |
| C    | 6.07974200  | -2.01596500 | -2.70153300 |
| C    | 5.64749400  | -2.69631800 | -1.54634500 |
| C    | 5.90227400  | -2.06094300 | -0.32206000 |
| C    | 6.29746200  | -0.72471900 | -0.27174200 |
| C    | 4.70699300  | -3.83819700 | -1.64623000 |
| C    | -4.47476300 | 4.61556000  | -1.44974000 |
| C    | -4.84834200 | 3.96930200  | -0.25661800 |
| C    | -5.55442800 | 2.76977300  | -0.27067700 |
| C    | -5.92101500 | 2.15952300  | -1.48062800 |
| C    | -5.78940700 | 2.94318400  | -2.64218400 |
| C    | -5.08937200 | 4.14081300  | -2.62622000 |
| C    | -1.82597900 | -6.11502400 | -1.51929500 |
| C    | -1.04354000 | -6.27004100 | -0.35984100 |
| C    | 0.34872400  | -6.25397900 | -0.41357200 |
| C    | 1.02923900  | -6.09665000 | -1.63169500 |
| C    | 0.25005100  | -6.22048700 | -2.79778400 |
| C    | -1.13509200 | -6.22110400 | -2.74364000 |
| C    | 3.82807800  | -3.86007000 | -2.74404000 |
| C    | 2.71109000  | -4.67712300 | -2.76505700 |
| C    | 2.39899600  | -5.53208400 | -1.69227500 |
| C    | 3.33350100  | -5.59316900 | -0.64204100 |
| C    | 4.45629500  | -4.76484600 | -0.61744700 |
| H    | -3.16186600 | 5.55825600  | -3.67404300 |
| H    | -0.82810300 | 6.15819000  | -3.78981200 |
| H    | -0.63084900 | 6.25983200  | 0.49811700  |
| H    | -2.99293700 | 5.75559900  | 0.62155200  |
| H    | -4.46714000 | 4.31912800  | 0.69479800  |
| H    | -5.68321900 | 2.23304900  | 0.66257100  |
| H    | -6.16967100 | 2.56943800  | -3.58821100 |
| H    | -4.94642300 | 4.66116900  | -3.56691800 |
| H    | 3.95292200  | -3.13716900 | -3.54227900 |
| H    | 2.00606700  | -4.55974200 | -3.57981600 |
| H    | 3.16171400  | -6.26556000 | 0.19366000  |

|   |             |             |             |
|---|-------------|-------------|-------------|
| H | 5.12584600  | -4.81357600 | 0.23674400  |
| H | 6.33968500  | -0.24900500 | 0.70171500  |
| H | 5.63747200  | -2.55610000 | 0.60627800  |
| H | 6.69909900  | -0.19135900 | -3.58704300 |
| H | 6.02310800  | -2.50783600 | -3.66776600 |
| H | 0.89953800  | -6.21842300 | 0.52031800  |
| H | -1.51258200 | -6.27629500 | 0.61784600  |
| H | 0.73218400  | -6.22686400 | -3.77013100 |
| H | -1.67746600 | -6.19704700 | -3.68174200 |
| C | -3.19966000 | -5.54675300 | -1.47785200 |
| C | -3.73872300 | -5.02530000 | -0.28719600 |
| C | -4.70930700 | -4.02772100 | -0.30327700 |
| C | -5.19560900 | -3.50825400 | -1.51312900 |
| C | -4.85559000 | -4.21848700 | -2.68001600 |
| C | -3.88577600 | -5.21038300 | -2.66252600 |
| H | -3.30499200 | -5.29024400 | 0.66906700  |
| H | -4.97479200 | -3.54943300 | 0.63315500  |
| H | -5.29809200 | -3.93527700 | -3.63031900 |
| H | -3.60192900 | -5.66139100 | -3.60694700 |
| C | -5.41152400 | -1.34613100 | -2.69145600 |
| C | -5.58813200 | 0.02771400  | -2.68265100 |
| C | -6.12306300 | 0.69420200  | -1.56579200 |
| C | -6.58289300 | -0.10885500 | -0.50652500 |
| C | -6.40616300 | -1.49242400 | -0.51614000 |
| C | -5.75988700 | -2.14029200 | -1.58460000 |
| H | -4.88045100 | -1.79404100 | -3.52400200 |
| H | -5.18957000 | 0.60656800  | -3.50855700 |
| H | -7.04246900 | 0.35729500  | 0.36049800  |
| H | -6.73269700 | -2.07013500 | 0.34390600  |
| C | 6.27246200  | 1.51657300  | -1.44914700 |
| C | 6.09818800  | 2.20917200  | -2.66574600 |
| C | 5.38909300  | 3.39841800  | -2.72726400 |
| C | 4.81153300  | 3.96622100  | -1.57523000 |
| C | 5.21985500  | 3.42781100  | -0.34619100 |
| C | 5.93362000  | 2.23132700  | -0.28546500 |
| H | 6.42852500  | 1.76882300  | -3.59936900 |
| H | 5.20358000  | 3.84835000  | -3.69788200 |
| H | 4.84206600  | 3.85239000  | 0.57825700  |
| H | 6.09808400  | 1.79263300  | 0.69251300  |
| C | 2.73931800  | 4.59758200  | -2.75329900 |
| C | 3.61724400  | 4.83818400  | -1.68116400 |
| C | 3.16881400  | 5.71708200  | -0.67860200 |
| C | 1.87764800  | 6.24682900  | -0.70170900 |
| C | 0.96844600  | 5.91765500  | -1.72345600 |



|   |              |              |              |
|---|--------------|--------------|--------------|
| C | 1. 45707800  | 5. 11764800  | -2. 77239600 |
| H | 3. 02364600  | 3. 89283100  | -3. 52646400 |
| H | 3. 82363300  | 5. 96167000  | 0. 15316400  |
| H | 1. 56090000  | 6. 89250900  | 0. 11255100  |
| H | 0. 78479500  | 4. 79874500  | -3. 56043100 |
| C | 0. 63859700  | -2. 33382800 | 4. 17015900  |
| C | 1. 96602500  | -2. 17207700 | 3. 59625300  |
| C | 2. 64986600  | -0. 96512600 | 3. 75412500  |
| C | 2. 03575000  | 0. 12943400  | 4. 49154500  |
| C | 0. 76346800  | -0. 02732100 | 5. 04166600  |
| C | 0. 04991800  | -1. 28485700 | 4. 87823900  |
| C | -0. 15870200 | -3. 12159200 | 3. 24294400  |
| C | 0. 67483600  | -3. 44592700 | 2. 09507100  |
| C | 1. 98857100  | -2. 85910900 | 2. 31395700  |
| C | 2. 68858200  | -2. 30976100 | 1. 23944800  |
| C | 3. 38406200  | -0. 39633300 | 2. 63597500  |
| C | 2. 39356800  | 1. 37568800  | 3. 82998300  |
| C | 1. 46470400  | 2. 41442200  | 3. 74603700  |
| C | 0. 13766600  | 2. 24981400  | 4. 32045300  |
| C | -0. 20560600 | 1. 05514400  | 4. 95511100  |
| C | -1. 51792800 | 0. 46636700  | 4. 73774500  |
| C | -1. 36008600 | -0. 97961000 | 4. 69057000  |
| C | -2. 12447800 | -1. 73513600 | 3. 80058600  |
| C | -1. 51057400 | -2. 82736500 | 3. 06231100  |
| C | 0. 12375700  | -3. 44702100 | 0. 81510600  |
| C | -1. 28293800 | -3. 14435700 | 0. 62582500  |
| C | -2. 08248200 | -2. 84060600 | 1. 72524700  |
| C | -3. 05517000 | -1. 76327200 | 1. 63675400  |
| C | -3. 07997400 | -1. 07838600 | 2. 92025600  |
| C | -3. 23118400 | 0. 30717600  | 2. 96539700  |
| C | -2. 43387000 | 1. 09597000  | 3. 89365000  |
| C | -2. 07525400 | 2. 34000000  | 3. 23125500  |
| C | -0. 81724500 | 2. 90541800  | 3. 44052900  |
| C | 3. 22562800  | 1. 05207100  | 2. 68291300  |
| C | 0. 20206600  | 3. 12791500  | -0. 11106300 |
| C | 1. 55048700  | 2. 83630600  | 0. 07054900  |
| C | 2. 16255600  | 1. 74549200  | -0. 66948100 |
| C | 1. 40154600  | 0. 99183500  | -1. 56485700 |
| C | -0. 00952500 | 1. 29736200  | -1. 75330200 |
| C | -1. 92241300 | 2. 17866800  | -0. 46504700 |
| C | -1. 93973600 | 2. 85811600  | 0. 82177500  |
| C | -0. 62853200 | 3. 44397000  | 1. 04085600  |
| C | -0. 08050900 | 3. 47461500  | 2. 32167000  |
| C | 1. 33020500  | 3. 17143200  | 2. 51139800  |

|   |             |             |             |
|---|-------------|-------------|-------------|
| C | 2.12494400  | 2.85691200  | 1.40883000  |
| C | 3.10738500  | 1.08504200  | 0.21424400  |
| C | 3.25800000  | -0.29465900 | 0.16884300  |
| C | 2.47238900  | -1.08462800 | -0.76379900 |
| C | 1.55953100  | -0.45527400 | -1.61248300 |
| C | 0.24624700  | -1.04479100 | -1.83090600 |
| C | -0.72457800 | 0.03864200  | -1.91647100 |
| C | -1.99728200 | -0.11848100 | -1.36490500 |
| C | -2.60847400 | 0.97558700  | -0.62367900 |
| C | -2.64815700 | 2.31820700  | 1.89353900  |
| C | -3.36351500 | 1.06236400  | 1.72858800  |
| C | -3.33883700 | 0.40447800  | 0.49847900  |
| C | -3.18205300 | -1.03859100 | 0.45134600  |
| C | -2.35360700 | -1.36471100 | -0.70033400 |
| C | -1.42288900 | -2.39868900 | -0.61509100 |
| C | -0.09605400 | -2.23899600 | -1.19373000 |
| C | 0.85932400  | -2.88955500 | -0.30932700 |
| C | 2.11417700  | -2.32653100 | -0.09901900 |
| C | 3.08616000  | 1.77195300  | 1.49854700  |
| C | 3.39211700  | -1.05099600 | 1.40642300  |
| C | -0.59683600 | 2.34566800  | -1.04221300 |

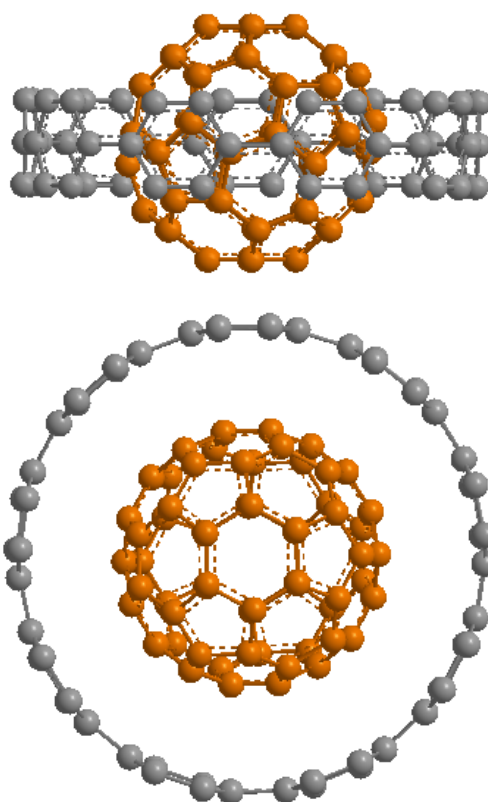

**Fig. S3** The configurations (Side view and Top view) of the I-[9]CPP@C<sub>60</sub> host-guest complexes at B3LYP/DFT-D3/6-31G(D) level of theory.

**Table S3** The Cartesian coordinates of I-[9]CPP $\supset$ C<sub>60</sub> optimized at B3LYP/DFT-D3/6-31G(D) level of theory

| Atom | x           | y           | z           |
|------|-------------|-------------|-------------|
| C    | -2.93266600 | 5.64565800  | -0.02478600 |
| C    | -3.60996500 | 5.27727800  | 1.15977500  |
| C    | -4.68370600 | 4.38508600  | 1.16510400  |
| C    | -5.16609800 | 3.77798400  | -0.01487600 |
| C    | -4.64242500 | 4.32849700  | -1.20442400 |
| C    | -3.57232800 | 5.22607600  | -1.20982800 |
| C    | -3.42362500 | -5.36245600 | -0.02406300 |
| C    | -2.76956700 | -5.77928700 | 1.15761300  |
| C    | -1.45984300 | -6.26238200 | 1.16070100  |
| C    | -0.68961300 | -6.36179700 | -0.01868500 |
| C    | -1.42478100 | -6.16942200 | -1.20796600 |
| C    | -2.73713100 | -5.69144700 | -1.21122100 |
| C    | 0.81543900  | -6.34795800 | -0.00663600 |
| C    | -1.51666300 | 6.15937200  | -0.01935700 |
| C    | -0.75212600 | 6.27415200  | -1.20326500 |
| C    | 0.64327000  | 6.29024300  | -1.19850400 |
| C    | 1.39469300  | 6.18792900  | -0.00827400 |
| C    | 0.62804100  | 6.30810800  | 1.17386400  |
| C    | -0.76762500 | 6.29740400  | 1.16907800  |
| C    | 6.09414900  | -1.76707600 | -0.01654900 |
| C    | 5.80557000  | -2.48234100 | -1.20161900 |
| C    | 5.12136500  | -3.69858200 | -1.19822000 |
| C    | 4.66161100  | -4.30179500 | -0.00810100 |
| C    | 5.15234600  | -3.70126600 | 1.17435400  |
| C    | 5.84153000  | -2.48754000 | 1.17077700  |
| C    | 1.54780500  | -6.14726100 | 1.18312300  |
| C    | 2.85069700  | -5.64365200 | 1.18781500  |
| C    | 3.52933200  | -5.29495700 | 0.00171800  |
| C    | 2.88288800  | -5.71987400 | -1.18126700 |
| C    | 1.58292500  | -6.22818000 | -1.18583500 |
| H    | -3.23169900 | 5.60299800  | 2.12285800  |
| H    | -5.07040800 | 4.07930100  | 2.13158600  |
| H    | -4.98516300 | 3.96386900  | -2.16671800 |
| H    | -3.16529200 | 5.50416300  | -2.17587100 |
| H    | -1.24331100 | 6.24317500  | -2.16969500 |
| H    | 1.14294700  | 6.26596200  | -2.16096900 |
| H    | 1.12032600  | 6.30723200  | 2.14039900  |
| H    | -1.26749400 | 6.28340700  | 2.13172200  |
| H    | 1.05967900  | -6.26143200 | 2.14495100  |
| H    | 3.28681500  | -5.40969900 | 2.15286000  |

|   |              |              |              |
|---|--------------|--------------|--------------|
| H | 3. 35554900  | -5. 55806200 | -2. 14416900 |
| H | 1. 13186800  | -6. 43074400 | -2. 15159200 |
| H | -3. 17716100 | -5. 46137400 | -2. 17539400 |
| H | -0. 93379600 | -6. 26867600 | -2. 16994200 |
| H | -3. 24587200 | -5. 63056600 | 2. 12089300  |
| H | -1. 00506600 | -6. 45956400 | 2. 12580800  |
| H | 4. 84430900  | -4. 11472500 | -2. 16082400 |
| H | 6. 01938100  | -2. 03771800 | -2. 16744800 |
| H | 4. 90814500  | -4. 12999800 | 2. 14030600  |
| H | 6. 08334300  | -2. 05059200 | 2. 13380700  |
| C | 6. 35785700  | -0. 28409000 | -0. 01983800 |
| C | 6. 31772800  | 0. 48061100  | -1. 20439400 |
| C | 6. 07543700  | 1. 85610800  | -1. 19887500 |
| C | 5. 85681900  | 2. 58398600  | -0. 00948300 |
| C | 6. 13957800  | 1. 86212400  | 1. 17062100  |
| C | 6. 37488700  | 0. 48601500  | 1. 16521500  |
| H | 6. 35888700  | -0. 01031300 | -2. 17057300 |
| H | 5. 93387100  | 2. 33571900  | -2. 16133400 |
| H | 6. 06711200  | 2. 34958900  | 2. 13721100  |
| H | 6. 46495700  | -0. 00506300 | 2. 12826400  |
| C | 4. 55200200  | 4. 41906000  | 1. 18698500  |
| C | 3. 46369500  | 5. 29475300  | 1. 18901800  |
| C | 2. 82058200  | 5. 70259000  | 0. 00196200  |
| C | 3. 50959500  | 5. 34903200  | -1. 18030300 |
| C | 4. 60020900  | 4. 47782000  | -1. 18229700 |
| C | 5. 09092400  | 3. 87993600  | -0. 00097500 |
| H | 4. 89716700  | 4. 05937800  | 2. 15024300  |
| H | 3. 04483500  | 5. 56044800  | 2. 15347600  |
| H | 3. 13001200  | 5. 67001900  | -2. 14442300 |
| H | 4. 99740400  | 4. 18187900  | -2. 14754600 |
| C | -4. 57663900 | -4. 39332700 | -0. 01244100 |
| C | -5. 05259000 | -3. 80416600 | 1. 17847500  |
| C | -5. 75984600 | -2. 60093400 | 1. 18419600  |
| C | -6. 05727300 | -1. 88683300 | 0. 00067700  |
| C | -5. 78704000 | -2. 59768500 | -1. 18844400 |
| C | -5. 07486300 | -3. 79786500 | -1. 19429400 |
| H | -4. 77114300 | -4. 21944300 | 2. 14023200  |
| H | -5. 98560500 | -2. 16386700 | 2. 15079000  |
| H | -6. 03408900 | -2. 16155600 | -2. 15048200 |
| H | -4. 81919300 | -4. 21807600 | -2. 16103700 |
| C | -6. 32676000 | 0. 35554700  | 1. 19031200  |
| C | -6. 35098600 | -0. 40963500 | 0. 00563900  |
| C | -6. 38352300 | 0. 35969700  | -1. 17953600 |
| C | -6. 17480300 | 1. 73989300  | -1. 18526000 |

|   |             |             |             |
|---|-------------|-------------|-------------|
| C | -5.90613700 | 2.46710200  | -0.00508600 |
| C | -6.11172500 | 1.73568100  | 1.18452400  |
| H | -6.35874300 | -0.13632200 | 2.15648300  |
| H | -6.46534900 | -0.13329100 | -2.14237300 |
| H | -6.11181700 | 2.22862900  | -2.15183500 |
| H | -5.98153500 | 2.21896700  | 2.14681000  |
| C | 1.26487500  | -0.68559400 | -3.26567200 |
| C | 0.01180000  | -1.42500200 | -3.27087600 |
| C | -1.20575100 | -0.73788500 | -3.27656100 |
| C | -1.21968500 | 0.71712900  | -3.27607400 |
| C | -0.01581300 | 1.42813900  | -3.27088900 |
| C | 1.25098500  | 0.71240200  | -3.26465000 |
| C | 2.20395200  | -1.40298000 | -2.41458700 |
| C | 1.53294900  | -2.58176000 | -1.89222100 |
| C | 0.18025900  | -2.59805100 | -2.42451200 |
| C | -0.86831000 | -3.01973700 | -1.60977800 |
| C | -2.30214300 | -1.19613200 | -2.43482300 |
| C | -2.32517600 | 1.15411400  | -2.43482900 |
| C | -2.17167600 | 2.26976900  | -1.61420300 |
| C | -0.92589400 | 3.00938200  | -1.60946700 |
| C | 0.13007100  | 2.60293800  | -2.42264300 |
| C | 1.48255500  | 2.61228100  | -1.89050300 |
| C | 2.17676600  | 1.44772900  | -2.41440200 |
| C | 3.06082100  | 0.75337500  | -1.59098100 |
| C | 3.07824900  | -0.69524700 | -1.59256900 |
| C | 1.76004600  | -2.98025300 | -0.57656000 |
| C | 2.67720900  | -2.25519200 | 0.27181600  |
| C | 3.31277900  | -1.13359300 | -0.22580800 |
| C | 3.45780100  | 0.02872400  | 0.61910700  |
| C | 3.28920800  | 1.19092200  | -0.22479700 |
| C | 2.63456700  | 2.29912700  | 0.27266200  |
| C | 1.70542400  | 3.01279200  | -0.57467800 |
| C | 0.61304200  | 3.44692400  | 0.26464400  |
| C | -0.67264600 | 3.43528400  | -0.24202300 |
| C | -2.99063900 | -0.02792700 | -1.91176100 |
| C | -2.20171100 | 1.40780700  | 2.43526000  |
| C | -3.07379700 | 0.69866800  | 1.61173400  |
| C | -3.06636800 | -0.75014100 | 1.61245400  |
| C | -2.17927400 | -1.44295400 | 2.43381900  |
| C | -1.25265100 | -0.70960200 | 3.28488800  |
| C | -0.00902000 | 1.42600700  | 3.29147500  |
| C | -0.17537400 | 2.59894400  | 2.44445800  |
| C | -1.52796000 | 2.58516000  | 1.91264200  |
| C | -1.75724100 | 2.98183000  | 0.59674600  |

|   |             |             |             |
|---|-------------|-------------|-------------|
| C | -2.67380300 | 2.25249600  | -0.25113000 |
| C | -3.30950800 | 1.13307000  | 0.24567200  |
| C | -3.29321000 | -1.19153100 | 0.24510100  |
| C | -2.63757300 | -2.30127800 | -0.25320000 |
| C | -1.70822300 | -3.01127100 | 0.59492800  |
| C | -1.48782800 | -2.60955700 | 1.91079200  |
| C | -0.13490900 | -2.60259500 | 2.44299400  |
| C | 0.01309400  | -1.42722600 | 3.28988700  |
| C | 1.21869800  | -0.71922400 | 3.29628600  |
| C | 1.20681800  | 0.73584100  | 3.29580300  |
| C | 0.87355300  | 3.02471200  | 1.63183000  |
| C | 2.13180800  | 2.30627500  | 1.63583200  |
| C | 2.30453400  | 1.19264300  | 2.45527700  |
| C | 2.99099400  | 0.02269900  | 1.93193100  |
| C | 2.32316300  | -1.15790900 | 2.45435000  |
| C | 2.17271800  | -2.27574700 | 1.63578900  |
| C | 0.92117200  | -3.00605400 | 1.62844600  |
| C | 0.67190100  | -3.43137500 | 0.26183400  |
| C | -0.61206300 | -3.44223000 | -0.24373400 |
| C | -3.45795900 | -0.03118600 | -0.59908300 |
| C | -2.13199700 | -2.31124000 | -1.61671900 |
| C | -1.26321500 | 0.68840900  | 3.28502300  |

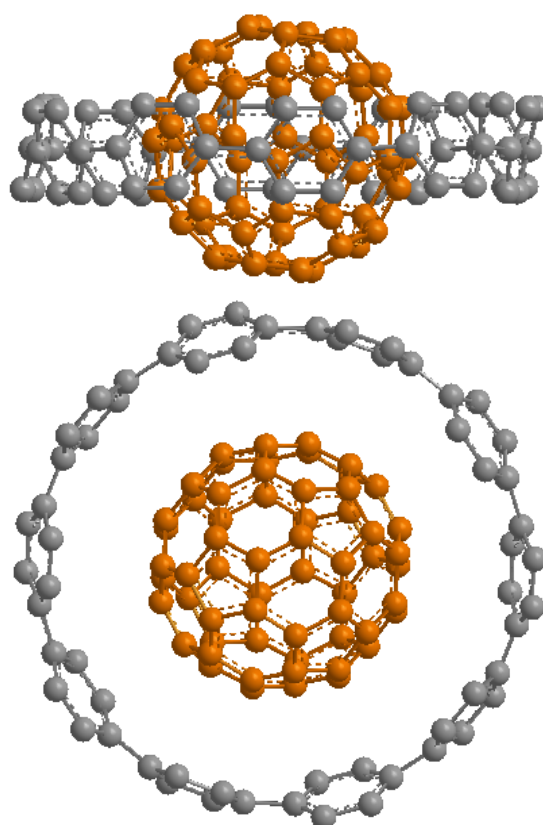

**Fig. S4** The configurations (Side view and Top view) of the [10]CPP $\supset$ C<sub>60</sub> host-guest complexes at B3LYP/DFT-D3/6-31G(D) level of theory.

**Table S4** The Cartesian coordinates of [10]CPP $\supset$ C<sub>60</sub> optimized at B3LYP/DFT-D3/6-31G(D) level of theory

| Atom | x           | y           | z           |
|------|-------------|-------------|-------------|
| C    | -4.37002700 | 5.31798600  | -0.04803300 |
| C    | -5.17078700 | 5.03888900  | 1.07331500  |
| C    | -6.05729400 | 3.96747500  | 1.07363200  |
| C    | -6.18093100 | 3.12784800  | -0.04676500 |
| C    | -5.50501600 | 3.51239200  | -1.21705300 |
| C    | -4.62042200 | 4.58128800  | -1.21749200 |
| C    | -3.73763100 | -5.78941000 | 0.03627800  |
| C    | -2.98457600 | -5.84990400 | 1.21957100  |
| C    | -1.68662400 | -6.34555900 | 1.21967800  |
| C    | -1.08253000 | -6.80751300 | 0.03817600  |
| C    | -1.90191800 | -6.91603900 | -1.09986500 |
| C    | -3.19866300 | -6.41766700 | -1.10107300 |
| C    | 0.39283800  | -6.87887200 | -0.04180900 |
| C    | -3.13480800 | 6.12722000  | 0.03670200  |
| C    | -2.53676000 | 6.70192200  | -1.09938500 |
| C    | -1.19730400 | 7.07029500  | -1.09733700 |
| C    | -0.39254700 | 6.87946000  | 0.04029600  |

|   |             |             |             |
|---|-------------|-------------|-------------|
| C | -1.03874200 | 6.47487900  | 1.22059300  |
| C | -2.37905800 | 6.10931400  | 1.21953500  |
| C | 1.08282900  | 6.80803300  | -0.03975800 |
| C | 1.68659500  | 6.34492200  | -1.22096600 |
| C | 2.98448000  | 5.84910800  | -1.22070200 |
| C | 3.73773400  | 5.78950900  | -0.03749700 |
| C | 3.19904300  | 6.41864800  | 1.09948800  |
| C | 1.90238000  | 6.91727500  | 1.09809000  |
| C | 6.18127400  | -3.12784400 | 0.04631800  |
| C | 6.05822900  | -3.96769100 | -1.07396600 |
| C | 5.17175200  | -5.03914800 | -1.07384600 |
| C | 4.37050400  | -5.31800400 | 0.04720200  |
| C | 4.62023800  | -4.58100800 | 1.21661100  |
| C | 5.50477800  | -3.51207700 | 1.21637100  |
| C | 1.19750900  | -7.07019300 | 1.09580500  |
| C | 2.53702200  | -6.70202500 | 1.09805200  |
| C | 3.13523700  | -6.12713900 | -0.03784300 |
| C | 2.37956800  | -6.10872800 | -1.22071500 |
| C | 1.03917700  | -6.47400000 | -1.22194300 |
| H | -5.05785200 | 5.63372000  | 1.97509900  |
| H | -6.61948500 | 3.74509900  | 1.97604800  |
| H | -5.56095500 | 2.88252500  | -2.09813500 |
| H | -4.01356500 | 4.75526400  | -2.09940200 |
| H | 1.08928600  | 6.23303600  | -2.11954800 |
| H | 3.35752500  | 5.36529900  | -2.11754800 |
| H | 3.78309400  | 6.46559500  | 2.01385700  |
| H | 1.49967400  | 7.34452800  | 2.01172300  |
| H | 0.75443900  | -7.45800200 | 2.00834200  |
| H | 3.11362600  | -6.80793800 | 2.01223500  |
| H | 2.79876600  | -5.66171800 | -2.11621900 |
| H | 0.45561500  | -6.30160000 | -2.11984900 |
| H | -3.78256200 | -6.46411700 | -2.01555900 |
| H | -1.49904200 | -7.34257400 | -2.01375500 |
| H | -3.35787400 | -5.36698400 | 2.11679200  |
| H | -1.08954600 | -6.23442500 | 2.11850700  |
| H | 5.05919900  | -5.63416500 | -1.97555900 |
| H | 6.62082200  | -3.74542100 | -1.97615900 |
| H | 4.01259600  | -4.75457300 | 2.09804400  |
| H | 5.56001700  | -2.88174200 | 2.09716500  |
| H | -0.75432300 | 7.45789000  | -2.01000900 |
| H | -3.11344000 | 6.80755500  | -2.01354900 |
| H | -0.45513800 | 6.30318800  | 2.11861100  |
| H | -2.79809600 | 5.66250300  | 2.11521000  |
| C | 6.73116300  | -1.75750500 | -0.04095700 |



|   |             |             |             |
|---|-------------|-------------|-------------|
| C | 6.55832600  | -1.02296700 | -1.22518100 |
| C | 6.62872000  | 0.36444500  | -1.22611200 |
| C | 6.87456700  | 1.07928000  | -0.04270100 |
| C | 7.23754100  | 0.33515600  | 1.09422300  |
| C | 7.16745000  | -1.05248000 | 1.09510500  |
| H | 6.21560500  | -1.52775100 | -2.12242300 |
| H | 6.33904000  | 0.90025700  | -2.12409600 |
| H | 7.51573300  | 0.85219600  | 2.00784900  |
| H | 7.39241700  | -1.59386600 | 2.00930300  |
| C | 5.82862700  | 2.94694700  | 1.21396700  |
| C | 5.05971800  | 4.10161700  | 1.21577600  |
| C | 4.88622400  | 4.86108800  | 0.04678600  |
| C | 5.65393100  | 4.50208700  | -1.07477600 |
| C | 6.42755600  | 3.34636900  | -1.07559400 |
| C | 6.46389500  | 2.49762200  | 0.04397900  |
| H | 5.81853300  | 2.31289000  | 2.09378500  |
| H | 4.47325200  | 4.33598200  | 2.09740100  |
| H | 5.60166700  | 5.10567400  | -1.97630000 |
| H | 6.96494500  | 3.06875500  | -1.97778300 |
| C | -4.88617400 | -4.86102800 | -0.04766300 |
| C | -5.65366400 | -4.50205500 | 1.07406600  |
| C | -6.42730900 | -3.34635200 | 1.07507300  |
| C | -6.46398800 | -2.49759000 | -0.04449300 |
| C | -5.82902900 | -2.94693800 | -1.21463100 |
| C | -5.06002500 | -4.10153800 | -1.21659300 |
| H | -5.60121900 | -5.10562800 | 1.97558900  |
| H | -6.96446800 | -3.06876700 | 1.97740700  |
| H | -5.81930900 | -2.31305300 | -2.09458100 |
| H | -4.47380400 | -4.33582200 | -2.09839600 |
| C | -6.62878600 | -0.36443100 | 1.22569100  |
| C | -6.87464000 | -1.07925800 | 0.04227600  |
| C | -7.23754300 | -0.33506700 | -1.09463200 |
| C | -7.16732000 | 1.05255800  | -1.09550600 |
| C | -6.73094500 | 1.75756400  | 0.04054400  |
| C | -6.55825600 | 1.02297600  | 1.22476400  |
| H | -6.33919400 | -0.90023900 | 2.12370600  |
| H | -7.51576200 | -0.85204500 | -2.00828500 |
| H | -7.39226700 | 1.59392400  | -2.00971800 |
| H | -6.21551900 | 1.52766900  | 2.12204700  |
| C | 2.00459700  | 1.07137000  | -2.73149100 |
| C | 0.76687000  | 0.69470600  | -3.39717700 |
| C | -0.38586000 | 1.46031700  | -3.21374100 |
| C | -0.35055600 | 2.63570500  | -2.35729100 |
| C | 0.83594200  | 2.99285900  | -1.71592100 |

|   |             |             |             |
|---|-------------|-------------|-------------|
| C | 2.03955700  | 2.19804600  | -1.90845600 |
| C | 2.68498700  | -0.14989700 | -2.32363000 |
| C | 1.86651500  | -1.28042600 | -2.73835700 |
| C | 0.68161000  | -0.75799200 | -3.40148200 |
| C | -0.55268100 | -1.38511400 | -3.22306800 |
| C | -1.67277700 | 0.80653700  | -3.02750300 |
| C | -1.61655000 | 2.70935100  | -1.64050700 |
| C | -1.64020500 | 3.13444700  | -0.31299800 |
| C | -0.40202700 | 3.50532400  | 0.35387300  |
| C | 0.80771400  | 3.43577200  | -0.33020700 |
| C | 1.99369300  | 2.91852100  | 0.33326000  |
| C | 2.75532400  | 2.15122100  | -0.64032500 |
| C | 3.40505700  | 0.98150500  | -0.24984800 |
| C | 3.36526400  | -0.19363200 | -1.10756600 |
| C | 1.76943700  | -2.40882600 | -1.92273700 |
| C | 2.48555400  | -2.45442100 | -0.65502100 |
| C | 3.26664200  | -1.37071200 | -0.25732600 |
| C | 3.24283500  | -0.92266800 | 1.12722300  |
| C | 3.32849500  | 0.53057200  | 1.13205600  |
| C | 2.60053300  | 1.26992400  | 2.06586000  |
| C | 1.92096500  | 2.49131100  | 1.65850500  |
| C | 0.65485900  | 2.56168400  | 2.37486000  |
| C | -0.48187700 | 3.06011000  | 1.73686400  |
| C | -2.43381300 | 1.57812500  | -2.05561200 |
| C | -2.68519600 | 0.14974500  | 2.32463300  |
| C | -3.36546300 | 0.19348100  | 1.10856800  |
| C | -3.40525100 | -0.98166000 | 0.25084300  |
| C | -2.75553000 | -2.15137700 | 0.64131600  |
| C | -2.03976500 | -2.19820000 | 1.90945400  |
| C | -0.76707600 | -0.69486000 | 3.39817400  |
| C | -0.68181400 | 0.75783800  | 3.40248400  |
| C | -1.86672000 | 1.28027000  | 2.73936500  |
| C | -1.76963900 | 2.40866600  | 1.92374100  |
| C | -2.48575300 | 2.45425700  | 0.65602200  |
| C | -3.26685300 | 1.37056400  | 0.25832200  |
| C | -3.32864800 | -0.53071400 | -1.13104500 |
| C | -2.60074400 | -1.27009200 | -2.06487900 |
| C | -1.92116200 | -2.49146900 | -1.65751300 |
| C | -1.99389500 | -2.91867400 | -0.33227000 |
| C | -0.80790900 | -3.43589100 | 0.33119400  |
| C | -0.83614900 | -2.99300000 | 1.71691300  |
| C | 0.35034600  | -2.63584200 | 2.35828400  |
| C | 0.38565500  | -1.46046700 | 3.21474000  |
| C | 0.55248000  | 1.38495800  | 3.22406900  |

|   |             |             |             |
|---|-------------|-------------|-------------|
| C | 1.75439300  | 0.58630400  | 3.03316800  |
| C | 1.67257500  | -0.80668900 | 3.02850100  |
| C | 2.43360200  | -1.57827300 | 2.05660100  |
| C | 1.61634000  | -2.70950000 | 1.64151600  |
| C | 1.64002400  | -3.13463600 | 0.31400600  |
| C | 0.40182400  | -3.50549000 | -0.35286800 |
| C | 0.48167900  | -3.06028900 | -1.73586500 |
| C | -0.65505600 | -2.56184800 | -2.37385900 |
| C | -3.24300200 | 0.92249500  | -1.12622100 |
| C | -1.75459300 | -0.58646100 | -3.03217300 |
| C | -2.00480100 | -1.07152500 | 2.73248900  |

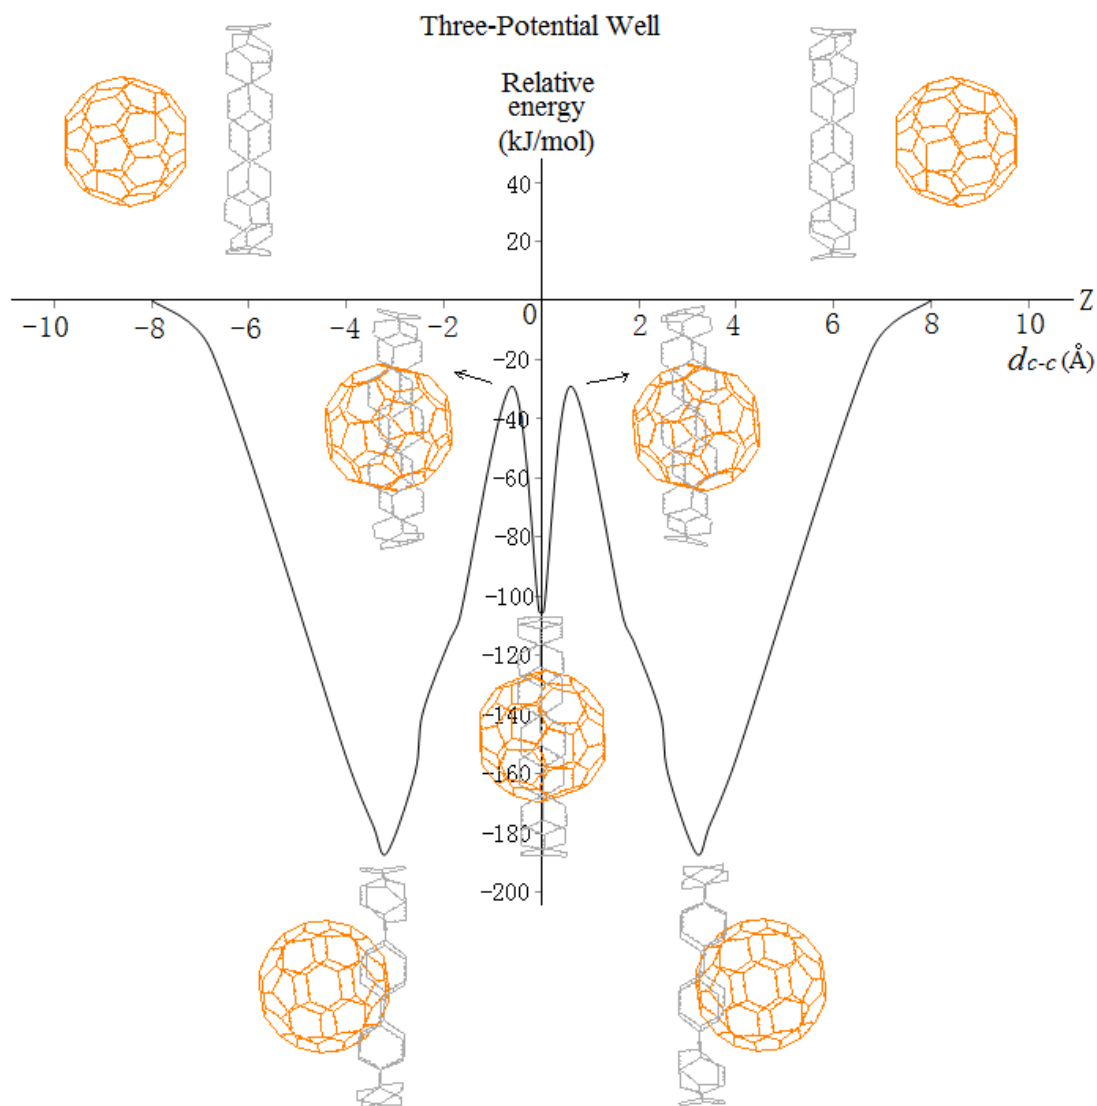

**Fig. S5** Energy profiles of the approach of  $C_{60}$  through the cavities of [9]CPPs rings at B3LYP/DFT-D3-D3/6-31G(D) level of theory.
